1 **A rare mutation in an infant derived HIV-1 envelope glycoprotein alters interprotomer stability**  
2 **and susceptibility to broadly neutralizing antibodies targeting the trimer apex.**

3 Nitesh Mishra,<sup>a</sup> Shaifali Sharma,<sup>a</sup> Ayushman Dobhal,<sup>a</sup> Sanjeev Kumar,<sup>a, \*</sup> Himanshi Chawla,<sup>a, \*</sup>  
4 Ravinder Singh,<sup>b</sup> Bimal Kumar Das,<sup>b</sup> Sushil Kumar Kabra,<sup>c</sup> Rakesh Lodha,<sup>c</sup> Kalpana Luthra,<sup>a#</sup>.

5 <sup>a</sup>Department of Biochemistry, All India Institute of Medical Sciences, New Delhi, India.

6 <sup>b</sup>Department of Microbiology, All India Institute of Medical Sciences, New Delhi, India.

7 <sup>c</sup>Department of Pediatrics, All India Institute of Medical Sciences, New Delhi, India.

8 Running Head: Rare Mutation Destabilizing HIV-1 Env Trimer Apex.

9 #Address correspondence to Kalpana Luthra, kalpanaluthra@gmail.com.

10 \*Present Address: Sanjeev Kumar, International Centre for Genetic Engineering and Biotechnology,  
11 New Delhi, India. Himanshi Chawla, Biological Sciences and the Institute for Life Sciences, University  
12 of Southampton, Southampton, SO17 IBJ, United Kingdom.

13 Abstract Word Count: 249

14 Article Word Count: 4942

15

16 **Abstract (249/250 words)**

17 The envelope glycoprotein (Env) of human immunodeficiency virus-1 (HIV-1) is the sole target of  
18 broadly neutralizing antibodies (bnAbs). Several mechanisms, such as acquisition of mutations due to  
19 the error prone reverse transcriptase, variability of loop length and alterations in glycan pattern are  
20 employed by the virus to shield neutralizing epitopes on the env, to sustain survival and infectivity  
21 within the host. Identification of mutations that can lead to viral evasion from host immune response is  
22 essential for optimization and engineering of Env based trimeric immunogens. Herein, we report a  
23 rare leucine to phenylalanine escape mutation (L184F) at the base of hypervariable loop 2 (population  
24 frequency of 0.0045%) in a nine-month-old perinatally HIV-1 infected infant broad neutralizer. The  
25 L184F mutation disrupted the intramolecular interaction, stabilizing the trimer apex thereby leading to  
26 viral escape from autologous plasma bnAbs and known bnAbs, targeting exclusively the N160 glycan  
27 at trimer apex and not any other known epitope. The L184F amino acid change led to acquisition of a  
28 relatively open trimeric configuration, often associated with tier 1 HIV-1 isolates and an increased  
29 susceptibility to neutralization by polyclonal plasma antibodies of weak neutralizers. While there was  
30 no impact of the L184F mutation on free virus transmission, a reduction in cell-to-cell transmission  
31 was observed. In conclusion, we report a viral escape mutation that plausibly destabilized the trimer  
32 apex and favoured evasion from broadly neutralizing antibodies. Such mutations, though rare, should  
33 be taken into consideration while designing an immunogen, based on a stable correctly-folded HIV-1  
34 Env trimer.

35 **Importance (148/150 words)**

36 Design of HIV-1 envelope-based immunogens, capable of eliciting broadly neutralizing antibodies  
37 (bnAbs), are currently under active research. Some of the most potent bnAbs target the quaternary  
38 epitope at the V2 apex of HIV-1 Env trimer. By studying naturally circulating viruses from an HIV-1  
39 perinatally infected infant, with plasma neutralizing antibodies targeted to the V2-apex, we identified a  
40 rare leucine to phenylalanine substitution in two out of six functional viral clones, that destabilized the  
41 trimer apex. This single amino acid alteration impaired the interprotomeric interactions that stabilize  
42 the trimer apex, resulting in an open trimer conformation, and escape from broadly neutralizing  
43 autologous plasma antibodies and known V2-apex directed bnAbs, thereby favouring viral evasion of  
44 the early bnAb response of the infected host. Defining the mechanisms by which viral mutations

45 influence the sensitivity of HIV-1 to bnAbs is crucial for the development of effective vaccines against  
46 HIV-1 infection.

## 47 **Introduction**

48 Elicitation of antibodies capable of neutralizing globally circulating human immunodeficiency virus  
49 type 1 (HIV-1) viral variants is one of the vital goals of HIV-1 vaccine research (1, 2). The HIV-1  
50 Envelope glycoprotein (Env) is a trimer of non-covalently linked heterodimers (gp120/gp41)<sub>3</sub>, and is  
51 the primary target of broadly neutralizing antibodies (bnAbs). Persistent antigenic stimulation and viral  
52 diversification under immune selection pressure are typically associated with the development of  
53 bnAbs, though infected infants have been reported to develop bnAbs as early as one-year post-  
54 infection (3–5). The bnAbs targeting the viral Env are grouped by epitope class: the variable loop 2  
55 and the N160 glycan (V2-apex), the third variable loop and the N332 glycan (V3/N332-glycan  
56 supersite, or the high-mannose patch), the CD4 binding site (CD4bs), gp120/gp41 interface region,  
57 the silent face centre, and the membrane proximal external region (MPER) of gp41 (6, 7). These  
58 bnAbs are capable of neutralizing diverse circulating variants of HIV-1 and are generated in rare  
59 subsets of infected individuals. Passive administration of such bnAbs in animal models and in recently  
60 conducted human clinical trials with bnAbs alone, or in combination with antiretroviral therapy, have  
61 shown protection from HIV-1 infection (8–13).

62 No vaccination approach has been successful in inducing bnAbs in humans or standard animal  
63 models, though vaccination with native-trimers have thus far induced strain specific and cross-  
64 subtype specific nAbs (14–18). To overcome the high level of genetic diversity in HIV-1 Envelope  
65 genes, strategies to induce antibodies that cross-react with multiple strains of HIV-1 is the need of the  
66 hour. Considerable interest exists in the field relevant to viral features associated with induction and  
67 escape mechanisms responsible for V2-apex bnAbs as these bnAbs have been reported to emerge  
68 early (19–21), are elicited frequently (22–25), possess relatively low to moderate levels of somatic  
69 hypermutations compared to other bnAbs (19–22, 24–26) and show cross-group neutralizing activity  
70 with Envs of HIV groups M, N, O, and P (27, 28), thereby identifying the V2-apex as one of the  
71 promising Env epitopes for vaccine design. The extraordinary ability of HIV-1 to evade host immunity  
72 represents a major obstacle to the development of a protective vaccine. Thus, elucidating the  
73 mechanisms employed by HIV-1 to protect its external envelope (Env), which is the sole target of

74 virus-neutralizing antibodies, is an essential step toward developing rational strategies for optimizing  
75 Env-based immunogens.

76 In a recently reported cohort of HIV-1 infected infants with an early plasma bnAb response targeting  
77 the Envelope glycoprotein, we had identified a 9-month old infant, AIIIMS731, whose plasma bnAbs  
78 showed maximum dependence on the V2-apex with 75% breadth at a geometric mean titre (GMT) of  
79 130 against the standardized 12-virus global panel representing global viral diversity (29). In order to  
80 understand the virus-antibody dynamics in the context of neutralizing determinants within the V2-apex  
81 and early induction of V2-apex targeting plasma bnAbs, herein we studied the viral features associated  
82 with escape from plasma bnAbs in an infant broad neutralizer AIIIMS731. A rare leucine to  
83 phenylalanine mutation (L184F) that impaired the interprotomer stability and consequently led to an  
84 open Env trimer conformation was identified. Of note, this rare mutation provided escape from  
85 autologous plasma bnAbs as well as several known bnAbs targeting the V2-apex, despite  
86 transforming a tier 2 HIV-1 strain into a tier 1 strain, in contrast to known alteration of tiered  
87 phenotypes associated with neutralization escape.

## 88 **Results**

### 89 **A rare mutation at the base of hypervariable loop 2 of the viral Env confers resistance to** 90 **autologous plasma bnAbs in an HIV-1 infected infant broad neutralizer AIIIMS731**

91 On the basis of plasma neutralization data against difficult-to-neutralize (Tier 2/3) Global Panel of  
92 HIV-1 isolates and epitope mapping done using single base mutants in 25710\_2\_43, 16055\_2\_3 and  
93 CAP45\_G3 and BG505.W6M.C2 pseudoviral backbones (29), an HIV-1 infected infant AIIIMS731 was  
94 previously categorized as a broad neutralizer with plasma bnAbs targeting the N160-glycan in the V2-  
95 apex of HIV-1 Env (**Figure 1A – C**).

96 In order to evaluate the viral population dynamics associated with the presence of V2-apex plasma  
97 bnAbs in this infant broad neutralizer, first, we cloned functional Env genes from the plasma RNA via  
98 single genome amplification (SGA), and assessed their susceptibility to autologous plasma bnAbs. A  
99 total of 40 Env gene sequences (clade C) from AIIIMS731 were available (29), and the depth of SGA  
100 sequencing gave us a 90% confidence interval of identifying circulating variants present at a  
101 population frequency of 5%. Based on sequence identity, the SGA sequences represented the six  
102 dominant R5-tropic circulating strains in AIIIMS731 plasma, and were highly homogenous, with

103 sequence variability between the clones ranging from 0.1 to 0.4% (**Figure 2A – C**). Viral variants  
104 within the cluster 73105h and 73106f were the dominant circulating strains, while cluster 73105b,  
105 73105c, 73105e and 73105d represented the remaining circulating strains (with population frequency  
106 >5%). From each cluster, a single viral variant was cloned into the pcDNA3.1 (+) mammalian  
107 expression vector and pseudotyped for neutralization assays.

108 Despite the high degree of similarity between the viral variants, a consistent hierarchy of  
109 neutralization sensitivity to contemporaneous autologous plasma bnAbs was observed (**Figure 3A**).  
110 Viral clone 73105b showed near-complete neutralization (maximum percent neutralization of  $87 \pm 4\%$ )  
111 by autologous plasma bnAbs while clone 73105h and 73106f showed significant abrogation of  
112 neutralization sensitivity (maximum percent neutralization of  $24 \pm 3\%$ ) to autologous plasma bnAbs.  
113 Despite neutralizing autologous circulating variants with an ID<sub>50</sub> titres roughly three-fold higher than  
114 the median titres against the multiclade panel of HIV-1 isolates (median ID<sub>50</sub> of 362 vs 127), none of  
115 the autologous viruses were completely neutralized by plasma bnAbs with maximum percent  
116 neutralization (MPN) for sensitive viruses ranging from 83 to 91%. Both the clones 73105h and  
117 73106f had MPN in the range of 21 to 27%. Of note, plasma bnAb resistant viral variants 73105h and  
118 73106f were the dominant circulating strains (13 and 15 of the 40 SGA sequences, respectively)  
119 (**Figure 2C**).

120 To identify residues conferring resistance to contemporaneous autologous plasma bnAbs, we  
121 conducted a comparative sequence analysis. Examination of the core V2-apex bnAb epitope revealed  
122 no sequence change despite varying neutralization sensitivity between the viral clones. Of particular  
123 note, all the circulating viral variants retained the key epitope-defining patterns of specific amino acid  
124 residues and N-linked glycosylation sites in the V2-apex bnAb epitope. Mutations were mapped  
125 relative to variant 73105b as it represented the consensus amino acid sequence as well as showed  
126 highest susceptibility to autologous plasma bnAbs (**Figure 3B – C**). In case of clone 73105h, in  
127 addition to L184F, an additional mutation of I255V (small, non-polar sidechain mutated to another  
128 small, non-polar sidechain) within the C2 region was observed. In clone 73105c, N229Y was  
129 observed while for clones 73105d (D135E and S143T) and 73105e (S143T), mutations within  
130 hypervariable loop 1 (132 – 152, HXB2 numbering) were observed. A single change of L184F was  
131 observed in clone 73106f (neutralization resistant) compared to the clone 73105b (most susceptible to  
132 neutralization) suggesting that a mutation outside that of the bnAb targeting epitopes in the V2 region

133 may have led to viral escape of the clone 73106f from the V2-apex targeting autologous plasma  
134 bnAbs (**Figure 3B – C**). D135E, S143T, and N229Y had no impact on neutralization by autologous  
135 plasma bnAb, and were, therefore, excluded from further analysis.

136 To assess the frequency of the L184F mutation, that led to replacement of a small, non-polar side  
137 chain with a bulky non-polar side chain, we examined the variability (amino acid changes). at position  
138 184 (**HXB2 numbering**) in all reported HIV-1 Env sequences Analysis of 7094 Env sequences from  
139 Los Alamos National Laboratory (LANL) HIV-1 sequence database revealed the extreme rarity of the  
140 L184F mutation. The presence of Phenylalanine at position 184 was found in 32 of the 7094 (a  
141 population frequency of 0.0045%) reported viral sequences available at HIV database, with 17  
142 instances reported in clade C (**Table 1**). Position 184 most commonly contains either isoleucine or  
143 leucine, at a population frequency of 59.3 and 28.6% respectively (**Table 1 and Figure 3D**). Overall,  
144 these results suggested the acquisition of a rare mutation by both 73105h and 73106f viral clone may  
145 have led to viral escape from plasma bnAbs in the infected infant AIIIMS731.

#### 146 **L184F provides neutralization escape from V2-apex targeting bnAbs and contributes to the** 147 **instability of the trimeric form**

148 Next, we evaluated the neutralization susceptibility of all six viral variants from AIIIMS731 to assess if  
149 the mutations acquired by these viral variants altered neutralization to known V2-apex bnAbs. For all  
150 V2-apex bnAbs tested (PG9, PG16, PGT145, PGDM1400, CAP256.25, and CH01), as observed with  
151 autologous plasma bnAbs, AIIIMS731 viral variants segregated in neutralization sensitive (73105b,  
152 73105c, 73105d and 73105e) and resistant (73105h and 73106f) clusters (**Figure 4**). For resistant  
153 variants, we observed a marked increase in  $IC_{50}$  and reduction in MPN, with the most significant  
154 reduction observed for PG9 and CAP256.25. Except PGDM1400 and CAP256.25, two of the most  
155 potent V2-apex bnAbs known, none of the V2-apex bnAbs could reach 100% neutralization, even at  
156 higher concentration for 73105b (most sensitive clone). For L184F mutant clones 73105h and 73106f,  
157 none of the bnAbs reached 100% neutralization and showed shallow dose-response curves. The  
158 slope of neutralization curves for the V2-apex bnAbs were steeper, and had the expected sigmoidal  
159 curve for variants in neutralization sensitive cluster compared to L184F mutants 73105h and 73106f  
160 (**Figure 4**), suggesting that the viral Envs in sensitive cluster were plausibly homogenously trimeric

161 and uniformly recognized via trimeric-configuration as the V2-apex targeting bnAbs are reported to be  
162 trimer-preferring and to target the HIV-1 Env trimer in a closed conformation (30–33).

163 Next, we used an exhaustive panel of bnAbs targeting other known epitopes on the Env in order to  
164 assess the neutralization efficiency of bnAbs other than those targeting the V2 region, by comparing  
165 the neutralization curves for all six viral variants. The bnAb panel consisted of: V3/N332-glycan  
166 supersite bnAbs (10-1074, BG18, AIIMS-P01, PGT121, PGT128 and PGT135); CD4bs bnAbs  
167 (VRC01, VRC03, VRC07-523LS, N6, 3BNC117, and NIH45-46 G54W); silent face targeting bnAb  
168 (PG05); fusion peptide and gp120/gp41 interface bnAbs (PGT151, 35O22 and N123-VRC34.01); and  
169 MPER bnAbs (10E8, 4E10 and 2F5). Neutralization assays showed similar neutralization phenotypes  
170 of these bnAbs for all six variants, regardless of their susceptibility to V2-apex bnAbs (**Table 2**),  
171 suggesting that the L184F mutation was specific to the viral escape from susceptibility to  
172 neutralization by V2-apex bnAbs and had negligible effect on the neutralization by other classes of  
173 bnAbs.

174 In neutralization assays performed with non-neutralizing antibodies (non-nAbs) targeting the V3 loop  
175 (447-52d and 19b) and CD4-induced epitopes (17b, A32, 48d, b6), L184F mutants 73105h and  
176 73106f showed weak neutralization by the V3 loop non-nAbs (MPN of 29% and 28% for 447-52D;  
177 29% and 31% for 19b, respectively) and CD4i non-nAbs (MPN of 35% and 36% for 17b; 26% and  
178 23% for 48d respectively), although even at high concentrations, none of the non-nAbs reached IC<sub>50</sub>  
179 titres against the L184F mutant (**Figure 5A – B**). Of note, 17b binds preferentially to the CD4-induced,  
180 CCR5 co-receptor binding site epitope on Env (34). Thus, L184F mutation resulted in increased  
181 susceptibility to neutralization by antibodies known to target the relatively more open conformation of  
182 the Env, suggesting that the rare L184F mutation allowed the Env to sample more open states  
183 (characteristics of Tier 1A and 1B viral variants) resembling CD4-bound conformation where the  
184 CCR5 binding site is exposed; though this observation can only be accurately validated by  
185 undertaking in-depth structural studies.

186 Taken together, these results suggest L184F mutation conferred resistance to neutralization via  
187 trimer-preferring V2-apex bnAbs, and allowed the Env trimer to transition towards a more open  
188 configuration that partially exposed the occluded non-nAbs epitopes within V3 loop and CD4bs.

189 **Preferential recognition of the closed Env trimer by potent plasma antibodies from pediatric**  
190 **neutralizers**

191 Destabilization of the trimer apex has been shown to alter the neutralization susceptibility of HIV-1  
192 Env to antibodies present in the plasma of infected individuals. As L184F mutation resulted in a more  
193 open trimer configuration, we next evaluated the sensitivity of L184F mutant to a panel of HIV-1 clade  
194 C infected pediatric patient plasma with varied neutralization potency (weak versus strong  
195 neutralizers) against the global panel of representative HIV-1 isolates (35–37). Patient plasma  
196 antibodies neutralizing more than half the global panel were considered strong neutralizers while  
197 those neutralizing less than half the panel were considered weak to moderate neutralizers depending  
198 on their breadth and potency. The neutralization susceptibility profile of L184F mutants 73105h and  
199 73106f to plasma antibodies of well-characterized HIV-1 clade C infected pediatric donors (whose  
200 plasma antibodies showed varied neutralization activity against the 12-virus global panel) showed  
201 comparable ID<sub>50</sub> values between weak and strong neutralizers (**Figure 6A – C**), confirming that viral  
202 variant belonging to autologous plasma bnAb neutralization sensitive cluster (73105b, 73105c,  
203 73105d and 73105e) showed a Tier 2 phenotype while the viral variants 73105h and 73106f had a  
204 Tier 1B neutralization phenotype.

205 The 73105b (most sensitive to autologous plasma bnAbs) virus clone was highly susceptible to the  
206 plasma of strong neutralizers with ID<sub>50</sub> values ranging from 1:248 to 1:1965 while the susceptibility to  
207 weak neutralizers ranged from 1:50 to 1:188 (1:50 was the lowermost dilution tested). For the L184F  
208 mutant 73106f, ID<sub>50</sub> titres of strong neutralizers (range – 1:388 to 1:2756) versus weak neutralizers  
209 (range – 1:176 to 1:1246) had similar profile suggesting regardless of their ability to generate  
210 antibodies capable of targeting closed Env trimers, weak neutralizers develop high titres of antibodies  
211 targeting the open configuration of the Env trimer.

212 **L184F escape mutation resulted in reduced entry kinetics in cell-cell transmission**

213 As V1V2 stabilizes the Env spike forming the trimer apex, we next performed a stability-of-function  
214 assay, called T90 assay, that determines Env stabilization (viral infectivity) as a function of  
215 temperature (38, 39), to evaluate the effect of the L184F mutation on the Env stability. A slight  
216 increase in T90 value, the temperature at which the viral infectivity decreased by 90% in 1 hour, from



217 43.27 to 43.69 ( $p = 0.19$ ) was observed, though the impact of L184F on thermal stability did not  
218 appear markedly noticeable (**data not shown**).

219 Changes at the trimer apex have been shown to alter virus sensitivity and often come with a fitness  
220 cost (39–42). In order to investigate the effect of acquisition of the rare L184F viral immunotype on the  
221 functional stability of the Env, we assessed the impact of L184F mutation on viral infectivity in free  
222 virus and cell-cell transmission. The relative infectivity of all six viral variants was assessed by titration  
223 curves after normalizing pseudoviral infectivity by using the viral stock dilution that gave a relative  
224 luminescence unit (RLU) of 150,000 in TZM-bl cells. No change in the infectivity of the L184F mutant  
225 was observed in case of infection with free virus, though we detected substantial variability in entry  
226 kinetics of L184F mutants 73105h and 73106f in cell-cell transmission (**Figure 7A – B**), suggesting a  
227 plausible fitness cost associated with escape from plasma bnAbs via the acquisition of rare viral  
228 L184F immunotype, that needs to be further confirmed.

#### 229 **L184F escape mutation impaired interprotomer interaction at trimer apex**

230 The V2-apex bnAbs target quaternary epitopes formed by interprotomeric interactions at the apex of  
231 HIV-1 Env trimer. The core epitope for V2-apex bnAbs is formed by the N-linked glycan sites N156  
232 and N160, and the lysine rich region of strand C (HXB2 numbering: 156 – 177). As the L184F escape  
233 mutation did not arise within the core epitope, and that this mutant virus showed a tier 1 neutralization  
234 phenotype, we reasoned that the L184F mutation was plausibly responsible for disrupting the  
235 interprotomer interactions that stabilize the close conformation of the Env trimer.

236 To elucidate the mechanism by which the L184F mutation could have disrupted the conformation of  
237 the Env trimer, we analyzed the L184F mutation using the ligand-free pre-fusion closed structure of  
238 BG505 SOSIP.664 HIV-1 Env trimer (PDB ID: **4ZMJ**). Residues 165 and 184 in BG505 were changed  
239 to their counterpart (R165 and L184) in 73105b. In previous reports, I184 of one protomer has been  
240 shown to interact with L165 of the neighbouring protomer. This inter-protomeric interaction has been  
241 shown to be critical for quaternary interactions leading to the stabilization of the V1V2 regions of  
242 neighbouring protomers, and its loss has been shown to render JR-FL, a clade B HIV-1 strain, highly  
243 sensitive to V3 mAbs (42, 43). On similar lines, we observed L184 of one promoter interacting with  
244 R165 of another protomer [via van der Waals interactions between the solvent-accessible surface  
245 (SAS) of R165 and L184 on neighbouring protomers] (**Figure 8A**). The side chain of L184 was

246 observed to be outward facing and did not make significant intra-protomeric interactions. On mutating  
247 L184 to F184, disruption of SAS between the bulky side chain of F184 on one protomer and R165 on  
248 neighbouring protomer was seen (**Figure 8B**). In addition, we generated a homology model based on  
249 the sequence of 73105b based on multiple structural templates, and after loop refinement, Man-9-  
250 Glycan sites were added to potential-N-linked glycosylation sites (PNGS) in silico to produce a near-  
251 fully glycosylated gp160 trimeric model. In 73105b homology model, similar interprotomeric  
252 interactions were seen between L184 of one protomer with R165 of neighbouring protomer which  
253 were lost when L184 was mutated to F184.

## 254 **Discussion**

255 During HIV-1 infection, the humoral immune response targets the HIV Envelope (Env) glycoprotein  
256 which consists of three heavily glycosylated non-covalently linked gp41-gp120 protomers (3–7). While  
257 strain-specific antibodies recognize exposed and variable sites, bnAbs target relatively conserved and  
258 occluded sites, including the quaternary V1V2 epitope at the trimer apex (V2-Apex), V3/N332-glycan  
259 supersite, CD4-binding site (CD4bs), gp120-gp41 interface, and membrane proximal external region  
260 (MPER). Of these, bnAbs targeting the quaternary V1V2 epitope (called V2-apex bnAbs) are elicited  
261 frequently and relatively early (19–26). HIV-1 eludes recognition by host bnAbs through a variety of  
262 mechanisms, though the most common mechanism includes sequence alterations that can lead to  
263 large variations in sensitivity to antibody-mediated neutralization among different circulating viral  
264 isolates. Herein, we investigated the viral escape mechanisms in a 9-month-old perinatally HIV-1  
265 infected infant with broadly neutralizing plasma antibodies targeting the V2-apex.

266 Escape from contemporaneous autologous plasma bnAbs occurred by a rare leucine to phenylalanine  
267 mutation at position 184. Interestingly, a high degree of similarity was observed between circulating  
268 viral strains, regardless of their sensitivity to plasma bnAbs, and L184F mutation, alone, was enough  
269 for escape from neutralization by plasma bnAbs. A similar neutralization profile for sensitive and  
270 resistant strains were observed when susceptibility to reported bnAbs targeting diverse epitopes on  
271 the Env was assessed. While the L184F mutation did not alter neutralization profile of the viral strains  
272 to bnAbs targeting the V3/N332 glycan supersite, CD4-binding site, gp120/gp41 interface or MPER, a  
273 significant reduction in neutralization susceptibility to several V2-apex bnAbs was seen. The most  
274 significant reduction observed was for CAP256.25 (also referred to as VRC25.26), a trimer-specific

275 bnAb that recognizes HIV-1 env trimers via its long protruding loop that interacts with strand C,  
276 insertions into the apex hole at trimer 3-fold axis as well as electrostatic interactions with cationic  
277 V1V2 surface residues (19, 30, 33). Given the complex mode of trimer recognition via CAP256.25  
278 which is a combination of PG9 and PGT145 class of bnAbs, and therefore, its stringent need for a  
279 closed conformation of Env trimer (33), the L184F mutation most likely seemed to alter the  
280 conformation of the Env trimer.

281 As V2-apex bnAbs target the closed conformation of the trimer, based on neutralization profile  
282 observed, we hypothesized that the most plausible reason for the loss of susceptibility to V2-apex  
283 bnAbs was the loss of closed conformation of the Env. In its closed conformation, the Env trimer  
284 occludes several immunodominant epitopes that are targeted by non-neutralizing antibodies (non-  
285 nAbs) (39, 41). When neutralization profile against several non-nAbs (those targeting CD4-induced  
286 epitopes and V3 loop) was assessed, the L184F mutant virus showed relatively higher neutralization  
287 susceptibility to non-nAbs. Of note, none of the non-nAbs could achieve 50% neutralization (17b,  
288 which binds preferentially to the CD4-induced, CCR5 co-receptor binding site epitope on Env  
289 achieved a maximum percent neutralization of 32%) (34), suggesting that the L184F mutation did not  
290 substantially alter the conformation of the Env. In addition, the L184F mutant virus showed high  
291 susceptibility to neutralization by polyclonal antibodies present in the plasma of weak neutralizers  
292 (HIV-1 infected patients that do not generate a potent response to HIV-1 Env) (35–37). HIV-1 Envs  
293 are categorized into tiers based on neutralization susceptibility to plasma antibodies (44, 45).  
294 Conventionally, viruses categorized as Tier 1 (generally lab-adapted strains) are easier to neutralize  
295 by plasma antibodies, while Tier 2 viruses are substantially more resistant. Tier 3 strains exhibit  
296 exceptional resistance to antibody-mediated neutralization. The neutralization tier phenotypes of HIV-  
297 1 isolates can be understood in the context of the dynamic nature of Env trimers on the virus surface  
298 (34, 46). These trimers spontaneously transition between closed, open, and at least one intermediate  
299 conformation. Open trimers expose more epitopes than closed trimers, and are typically reported to  
300 have a Tier 1 neutralization phenotype while trimers in closed state have Tier 2/3 neutralization  
301 phenotype. Tier 3 Envs have been shown to exclusively exist in a relatively narrow range of closed  
302 conformation. Overall, our findings suggest that the L184F led to the acquisition of a relatively open  
303 trimeric configuration, which is most typically associated with Tier 1 HIV-1 isolates. HIV-1 Env evades  
304 recognition by antibodies through diverse mechanisms, but one of the most effective mechanism is

305 the adoption of a closed trimeric configuration (typically associated with Tier 2 or 3 Envs). Our  
306 observation of acquisition of a rare mutation that led to an open, yet inaccessible to plasma V2-apex  
307 bnAbs, Env state suggests HIV-1 can lose its trimeric Env form to evade plasma bnAbs.

308 In silico structural analysis was then utilized to reveal the molecular feature that conferred resistance  
309 to V2-apex bnAbs. Substitution of the small side chain of leucine with the bulky non-polar side chain  
310 of phenylalanine led to disruption of interprotomer interactions that have been observed to be critical  
311 for maintenance of the trimeric apex. Mutations that alter or disrupt interprotomer contacts in Env  
312 trimer have been shown to change its susceptibility to several classes of bnAbs (39, 41–43). Overall,  
313 our results provide information on the role of a rare escape mutation L184F in the viral envelope that  
314 led to resistance to bnAbs targeting the V2-apex. Understanding the impact of viral escape mutations  
315 on the sensitivity of HIV-1 to bnAbs provides vital information for optimization of vaccines candidates  
316 against HIV-1. Furthermore, our data is suggestive of the prominent role of L184 mediated  
317 intramolecular interactions that are necessary for the maintenance of the trimer apex and adds to the  
318 information on conformational epitopes on the HIV-1 envelope towards the development of effective  
319 vaccines.

## 320 **Materials and methods**

### 321 **Study design and participants**

322 The current study was designed to assess the viral population dynamics in an infant broad neutralizer  
323 with plasma bnAbs targeting the V2-apex of HIV-1 Env. At the time of recruitment, AIIMS731 was  
324 antiretroviral naïve and asymptomatic; was 9-months old with a CD4 count of 1385 cells/mm<sup>3</sup> and  
325 viral load on log scale was 5.894 RNA copies/ml (785,000 RNA copies/ml); was recruited from the  
326 Pediatric Chest Clinic, Department of Pediatrics, AIIMS. After written informed consent from  
327 guardians, blood was drawn in 3-ml EDTA vials, plasma was aliquoted for plasma neutralization  
328 assays, viral RNA isolation, and viral loads. The study was approved by institute ethics committee of  
329 All India Institute of Medical Sciences (IECPG-307/07.09.2017).

### 330 **Plasmids, viruses, monoclonal antibodies, and cells**

331 Plasmids encoding HIV-1 env genes representing different clades, monoclonal antibodies and TZM-bl  
332 cells were procured from NIH AIDS Reagent Program. 10-1074 and BG18 expression plasmids were

333 kindly provided by Dr. Michel Nussenzweig, Rockefeller University, USA; VRC07-523LS and  
334 N123.VRC34.01 expression plasmids were provided by Dr. John Mascola, VRC, NIH, USA; and  
335 PG05 expression plasmids were provided by Dr. Peter Kwong, VRC, NIH, USA. CAP256.09,  
336 CAP256.25 and b6 were procured from IAVI Neutralizing Antibody Centre, USA. 293T cells were  
337 purchased from the American Type Culture Collection (ATCC).

### 338 **HIV-1 envelope sequences and phylogenetic analysis**

339 HIV-1 envelope genes were PCR amplified from plasma viral RNA by single genome amplification  
340 and directly sequenced commercially. Individual sequence fragments of SGA amplified amplicons  
341 were assembled using Sequencher 5.4 (Gene Code Corporation). Subtyping for SGA sequences was  
342 performed with REGA HIV subtyping tool (400bp sliding window with 200bp steps size). Inter-clade  
343 recombination was examined with RIP 3.0 (Recombinant Identification Program) and with jpHMM.  
344 Nucleotide sequences were aligned with MUSCLE in MEGA X. Maximum-likelihood trees were  
345 computed with MEGA X using a general-time reversal substitution model incorporating a discrete  
346 gamma distribution with 5 invariant sites.

### 347 **Cloning of autologous HIV-1 envelope genes and production of replication incompetent** 348 **pseudoviruses**

349 Autologous replication incompetent envelope pseudoviruses were generated from AIIIMS731 as  
350 described previously (29, 37). Briefly, viral RNA was isolated from 140 µl of plasma using QIAamp  
351 Viral RNA Mini Kit, reverse transcribed, using gene specific primer OFM19 (5' -  
352 GCACTCAAGGCAAGCTTTATTGAGGCTTA - 3') and Superscript III reverse transcriptase, into  
353 cDNA which was used in two-round nested PCR for amplification of envelope gene using High Fidelity  
354 Phusion DNA Polymerase (New England Biolabs). The envelope amplicons were purified, and ligated  
355 into pcDNA3.1D\_ITR vector via overlap extension cloning. Pseudoviruses were prepared by co-  
356 transfecting 1.25 µg of HIV-1 envelope containing plasmid with 2.5 µg of an envelope deficient HIV-1  
357 backbone (PSG3Δenv) vector at a molar ratio of 1:2 using PEI-MAX as transfection reagent in  
358 HEK293T cells seeded in a 6-well culture plates. Culture supernatants containing pseudoviruses were  
359 harvested 48 hours post-transfection, filtered through 0.4µ filter, aliquoted and stored at -80°C until  
360 further use. TCID<sub>50</sub> was determined by infecting TZM-bl cells with serially diluted pseudoviruses in

361 presence of DEAE-Dextran, and lysing the cells 48 hours post-infection. Infectivity titres were  
362 determined by measuring luminescence activity in presence of Bright Glow reagent (Promega).

### 363 **Infectivity and neutralization assay**

364 Viral infectivity and neutralization assays were carried out using TZM-bl cells, a genetically  
365 engineered HeLa cell line that constitutively expresses CD4, CCR5 and CXCR4, and contains  
366 luciferase and  $\beta$ -galactosidase gene under HIV-1 tat promoter, as described before (37). Viral  
367 infectivity was determined after normalizing pseudoviruses to an RLU value of 150,000 followed by  
368 titration curve generation to calculate relative infectivity. Neutralization studies included heat-  
369 inactivated plasmas from AIIIMS731 and previously characterized thirty plasmas of chronically infected  
370 children (35–37), 25 bnAbs (PG9, PG16, PGT145, PGDM1400, CAP256.25, CH01, 10-1074, BG18,  
371 AIIIMS-P01, PGT121, PGT128, PGT135, VRC01, VRC03, VRC07-523LS, N6, 3BNC117, NIH45-46  
372 G54W, PG05, PGT151, 35O22, N123.VRC34.01, 10E8, 4E10 and 2F5) and 6 non-nAbs (447-52D,  
373 19b, 17b, A32, 48d, b6). Briefly, envelope pseudoviruses were incubated in presence of serially  
374 diluted heat inactivated plasmas, bnAbs or non-nAbs for one hour. After incubation, freshly  
375 Trypsinized TZM-bl cells were added, with 25  $\mu$ g/ml DEAE-Dextran. The plates were incubated for  
376 48h at 37°C, cells were lysed in presence of Bright Glow reagent, and luminescence was measured.  
377 Using the luminescence of serially diluted bnAbs or plasma, a non-linear regression curve was  
378 generated and titres were calculated as the bnAb concentration, or reciprocal dilution of serum that  
379 showed 50% reduction in luminescence compared to untreated virus control. For epitope mapping,  
380 25710\_2\_43, 16055\_2\_3, CAP45\_G3 and BG505\_W6M\_C2 N160K mutants and pseudoviruses  
381 grown in presence of kifunensine and swainsonine were used and greater than 3-fold reduction in ID<sub>50</sub>  
382 titres were classified as dependence.

### 383 **HIV-1 Env stability-of-function assay**

384 Thermostability (T90) assays were performed as described previously (38, 39). Briefly, 73105b and  
385 73106f pseudotyped viruses were incubated at temperatures from 37°C to 50°C for 60 minutes using  
386 temperature gradient on PCR thermal cycler (BioRad). Pseudoviruses were then aliquoted in a 96-  
387 well culture plate, followed by addition of 10,000 TZM-bl cells per well. Infectivity was determined by  
388 performing titration curves and plotted as a function of temperature. T90 values were interpolated as  
389 the temperature at which virus infectivity decreased by 90%.

### 390 **HIV-1 Env cell-to-cell fusion assay**

391 HIV-1 Env mediated cell-to-cell fusion assays were performed as described previously (47, 48).  
392 Briefly, 293T cells were co-transfected with pTAT (pcTat.BL43.CC, #11785, NIH AIDS Reagent  
393 Program) and envelope plasmid encoding for either 73105b, 73106f and MW965.26 Env. To remove  
394 intra and inter-assay variability, all technical replicates were co-transfected and expressed on the  
395 same day. 293T cells transfected with pTAT only were used as negative control. 24-hour post-  
396 transfection, 10,000 pTAT/Env or pTAT transfected 293T cells were mixed with 10,000 TZM-bl cells  
397 (1:1 ratio) in 96-well culture plates, and incubated for 6 hours. Luciferase activity was measured using  
398 Bright Glow reagent and fusion activity (cell-to-cell transmission) for 73105b and 73106f was  
399 normalized to MW965.26 Env mediated fusion.

### 400 **Structural modelling and analysis**

401 Crystal structure of ligand-free BG505.SOSIP.664 HIV-1 Env trimer (PDB ID: **4ZMJ**) was used to  
402 assess the interprotomeric interactions due to L184 and F184. Mutations were modelled using the  
403 Rotamers tool with Dunbrack 2010 rotamer library (49). For modelled trimers based upon AIIIMS731  
404 Env sequences, crystal structure of HIV-1 envelope trimer (PDB ID: **6P65**, **6PWU**, **6MZJ** and **6B0N**)  
405 were used as template to generate homology models based on 73105b amino acid sequence.  
406 Homology modelling was carried out using the Modellar 9.22 interface (50) with UCSF Chimera  
407 package (51). High-mannose (Man-9) glycans were added to the modelled trimer using the  
408 glycoprotein builder interface available at Glycam web server (<http://glycam.org/>). To limit the  
409 computational complexity, Man-9 glycans were selected as computational complexity increases  
410 exponentially with complex and/or oligomannose glycans which have multiple branching topologies.

### 411 **Statistical analysis**

412 2-tailed student's t test for paired analysis and Mann-Whitney U test for unpaired analysis were used.  
413 For assessing the relative infectivity, area under curves were calculated. All statistical analyses were  
414 performed on GraphPad Prism 8. A p-value of <0.05 was considered significant.

415 **Data and materials availability:** The SGA amplified HIV-1 envelope sequences used for inference of  
416 phylogeny and highlighter plots are available at GenBank with accession numbers MT366192 –

417 MT366197. All data required to state the conclusions in the paper are present in the paper. Additional  
418 information related to the paper, if required, can be requested from the authors.

#### 419 **Acknowledgments**

420 We thank study subject AIIMS731 for participating in this study. We are thankful to NIH AIDS Reagent  
421 program for providing HIV-1 envelope pseudovirus plasmids, bnAbs, non-nAbs and their expression  
422 plasmids, and TZM-bl cells, and Neutralizing Antibody Consortium (NAC), IAVI, USA for providing  
423 bnAbs. We are thankful to Dr. Michel Nussenzweig for providing 10-1074 and BG18 bnAb expression  
424 plasmids; Dr. John Mascola for providing VRC07-523LS and N123.VRC34.01 bnAb expression  
425 plasmids; and Dr. Peter Kwong for providing PG05 bnAb expression plasmids.

#### 426 **Funding**

427 This work was funded by Department of Biotechnology, India (BT/PR30120/MED/29/1339/2018). The  
428 Junior Research Fellowship (January 2016 – December 2018) and Senior Research Fellowship  
429 (January 2019 – October 2019) to N.M was supported by University Grants Commission (UGC), India.

430 **Author contributions:** N.M designed the study, performed SGA amplification, pseudovirus cloning,  
431 and neutralization assays, analyzed data, wrote the initial manuscript, revised and finalized the  
432 manuscript. S.S and A.D contributed to SGA amplification, pseudovirus cloning, and neutralization  
433 assays. S.K and H.C expressed PGDM1400, CAP256.25, BG18, 10-1074 and AIIMS-P01 bnAb. R.S,  
434 B.K.D, R.L, and S.K.K, provided the samples from HIV-1 infected infant AIIMS731. R.L and S.K.K  
435 provided patient care and management. S.S, A.D, S.K, and H.C edited and revised the manuscript.  
436 K.L designed the study, edited, revised and finalized the manuscript.

437 **Competing interests:** The authors declare no competing financial interests.

#### 438 **References**

439 1. Steichen JM, Lin Y-C, Havenar-Daughton C, Pecetta S, Ozorowski G, Willis JR, Toy L, Sok D,  
440 Liguori A, Kratochvil S, Torres JL, Kalyuzhnyi O, Melzi E, Kulp DW, Raemisch S, Hu X, Bernard  
441 SM, Georgeson E, Phelps N, Adachi Y, Kubitz M, Landais E, Umotoy J, Robinson A, Briney B,  
442 Wilson IA, Burton DR, Ward AB, Crotty S, Batista FD, Schief WR. 2019. A generalized HIV  
443 vaccine design strategy for priming of broadly neutralizing antibody responses. *Science* 366.



- 444 2. Saunders KO, Wiehe K, Tian M, Acharya P, Bradley T, Alam SM, Go EP, Scarce R,  
445 Sutherland L, Henderson R, Hsu AL, Borgnia MJ, Chen H, Lu X, Wu NR, Watts B, Jiang C,  
446 Easterhoff D, Cheng H-L, McGovern K, Waddicor P, Chapdelaine-Williams A, Eaton A, Zhang J,  
447 Rountree W, Verkoczy L, Tomai M, Lewis MG, Desaire HR, Edwards RJ, Cain DW, Bonsignori  
448 M, Montefiori D, Alt FW, Haynes BF. 2019. Targeted selection of HIV-specific antibody  
449 mutations by engineering B cell maturation. *Science* 366.
- 450 3. Goo L, Chohan V, Nduati R, Overbaugh J. 2014. Early development of broadly neutralizing  
451 antibodies in HIV-1-infected infants. *Nat Med* 20:655–658.
- 452 4. Ghulam-Smith M, Olson A, White LF, Chasela CS, Ellington SR, Kourtis AP, Jamieson DJ,  
453 Tegha G, van der Horst CM, Sagar M. 2017. Maternal but Not Infant Anti-HIV-1 Neutralizing  
454 Antibody Response Associates with Enhanced Transmission and Infant Morbidity. *mBio* 8.
- 455 5. Kumar A, Smith CEP, Giorgi EE, Eudailey J, Martinez DR, Yusim K, Douglas AO, Stamper L,  
456 McGuire E, LaBranche CC, Montefiori DC, Fouda GG, Gao F, Permar SR. 2018. Infant  
457 transmitted/founder HIV-1 viruses from peripartum transmission are neutralization resistant to  
458 paired maternal plasma. *PLoS Pathog* 14:e1006944.
- 459 6. Sok D, Burton DR. 2018. Recent progress in broadly neutralizing antibodies to HIV. *Nat*  
460 *Immunol* 19:1179–1188.
- 461 7. Kwong PD, Mascola JR. 2018. HIV-1 Vaccines Based on Antibody Identification, B Cell  
462 Ontogeny, and Epitope Structure. *Immunity* 48:855–871.
- 463 8. Caskey M, Klein F, Lorenzi JCC, Seaman MS, West AP, Buckley N, Kremer G, Nogueira L,  
464 Braunschweig M, Scheid JF, Horwitz JA, Shimeliovich I, Ben-Avraham S, Witmer-Pack M,  
465 Platten M, Lehmann C, Burke LA, Hawthorne T, Gorelick RJ, Walker BD, Keler T, Gulick RM,  
466 Fätkenheuer G, Schlesinger SJ, Nussenzweig MC. 2015. Viraemia suppressed in HIV-1-  
467 infected humans by broadly neutralizing antibody 3BNC117. *Nature* 522:487–491.
- 468 9. Caskey M, Schoofs T, Gruell H, Settler A, Karagounis T, Kreider EF, Murrell B, Pfeifer N,  
469 Nogueira L, Oliveira TY, Learn GH, Cohen YZ, Lehmann C, Gillor D, Shimeliovich I, Unson-  
470 O'Brien C, Weiland D, Robles A, Kümmerle T, Wyen C, Levin R, Witmer-Pack M, Eren K,

- 471 Ignacio C, Kiss S, West AP, Mouquet H, Zingman BS, Gulick RM, Keler T, Bjorkman PJ,  
472 Seaman MS, Hahn BH, Fätkenheuer G, Schlesinger SJ, Nussenzweig MC, Klein F. 2017.  
473 Antibody 10-1074 suppresses viremia in HIV-1-infected individuals. *Nat Med* 23:185–191.
- 474 10. Bar-On Y, Gruell H, Schoofs T, Pai JA, Nogueira L, Butler AL, Millard K, Lehmann C, Suárez I,  
475 Oliveira TY, Karagounis T, Cohen YZ, Wyen C, Scholten S, Handl L, Belblidia S, Dizon JP,  
476 Vehreschild JJ, Witmer-Pack M, Shimeliovich I, Jain K, Fiddike K, Seaton KE, Yates NL,  
477 Horowitz J, Gulick RM, Pfeifer N, Tomaras GD, Seaman MS, Fätkenheuer G, Caskey M, Klein  
478 F, Nussenzweig MC. 2018. Safety and antiviral activity of combination HIV-1 broadly  
479 neutralizing antibodies in viremic individuals. *Nat Med* 24:1701–1707.
- 480 11. Cohen YZ, Butler AL, Millard K, Witmer-Pack M, Levin R, Unson-O'Brien C, Patel R,  
481 Shimeliovich I, Lorenzi JCC, Horowitz J, Walsh SR, Lin S, Weiner JA, Tse A, Sato A, Bennett C,  
482 Mayer B, Seaton KE, Yates NL, Baden LR, deCamp AC, Ackerman ME, Seaman MS, Tomaras  
483 GD, Nussenzweig MC, Caskey M. 2019. Safety, pharmacokinetics, and immunogenicity of the  
484 combination of the broadly neutralizing anti-HIV-1 antibodies 3BNC117 and 10-1074 in healthy  
485 adults: A randomized, phase 1 study. *PLoS ONE* 14:e0219142.
- 486 12. Mendoza P, Gruell H, Nogueira L, Pai JA, Butler AL, Millard K, Lehmann C, Suárez I, Oliveira  
487 TY, Lorenzi JCC, Cohen YZ, Wyen C, Kümmerle T, Karagounis T, Lu C-L, Handl L, Unson-  
488 O'Brien C, Patel R, Ruping C, Schlotz M, Witmer-Pack M, Shimeliovich I, Kremer G, Thomas E,  
489 Seaton KE, Horowitz J, West AP, Bjorkman PJ, Tomaras GD, Gulick RM, Pfeifer N,  
490 Fätkenheuer G, Seaman MS, Klein F, Caskey M, Nussenzweig MC. 2018. Combination therapy  
491 with anti-HIV-1 antibodies maintains viral suppression. *Nature* 561:479–484.
- 492 13. Mayer KH, Seaton KE, Huang Y, Grunenberg N, Isaacs A, Allen M, Ledgerwood JE, Frank I,  
493 Sobieszczyk ME, Baden LR, Rodriguez B, Van Tieu H, Tomaras GD, Deal A, Goodman D,  
494 Bailer RT, Ferrari G, Jensen R, Hural J, Graham BS, Mascola JR, Corey L, Montefiori DC,  
495 HVTN 104 Protocol Team, and the NIAID HIV Vaccine Trials Network. 2017. Safety,  
496 pharmacokinetics, and immunological activities of multiple intravenous or subcutaneous doses  
497 of an anti-HIV monoclonal antibody, VRC01, administered to HIV-uninfected adults: Results of a  
498 phase 1 randomized trial. *PLoS Med* 14:e1002435.

- 499 14. Voss JE, Andrabi R, McCoy LE, de Val N, Fuller RP, Messmer T, Su C-Y, Sok D, Khan SN,  
500 Garces F, Pritchard LK, Wyatt RT, Ward AB, Crispin M, Wilson IA, Burton DR. 2017. Elicitation  
501 of Neutralizing Antibodies Targeting the V2 Apex of the HIV Envelope Trimer in a Wild-Type  
502 Animal Model. *Cell Rep* 21:222–235.
- 503 15. Jones AT, Chamcha V, Kesavardhana S, Shen X, Beaumont D, Das R, Wyatt LS, LaBranche  
504 CC, Stanfield-Oakley S, Ferrari G, Montefiori DC, Moss B, Tomaras GD, Varadarajan R, Amara  
505 RR. 2018. A Trimeric HIV-1 Envelope gp120 Immunogen Induces Potent and Broad Anti-V1V2  
506 Loop Antibodies against HIV-1 in Rabbits and Rhesus Macaques. *J Virol* 92.
- 507 16. Bricault CA, Yusim K, Seaman MS, Yoon H, Theiler J, Giorgi EE, Wagh K, Theiler M, Hraber P,  
508 Macke JP, Kreider EF, Learn GH, Hahn BH, Scheid JF, Kovacs JM, Shields JL, Lavine CL,  
509 Ghantous F, Rist M, Bayne MG, Neubauer GH, McMahan K, Peng H, Chéneau C, Jones JJ,  
510 Zeng J, Ochsenbauer C, Nkolola JP, Stephenson KE, Chen B, Gnanakaran S, Bonsignori M,  
511 Williams LD, Haynes BF, Doria-Rose N, Mascola JR, Montefiori DC, Barouch DH, Korber B.  
512 2019. HIV-1 Neutralizing Antibody Signatures and Application to Epitope-Targeted Vaccine  
513 Design. *Cell Host Microbe* 25:59-72.e8.
- 514 17. Ringe RP, Pugach P, Cottrell CA, LaBranche CC, Seabright GE, Ketas TJ, Ozorowski G, Kumar  
515 S, Schorcht A, van Gils MJ, Crispin M, Montefiori DC, Wilson IA, Ward AB, Sanders RW, Klasse  
516 PJ, Moore JP. 2019. Closing and Opening Holes in the Glycan Shield of HIV-1 Envelope  
517 Glycoprotein SOSIP Trimers Can Redirect the Neutralizing Antibody Response to the Newly  
518 Unmasked Epitopes. *J Virol* 93.
- 519 18. Klasse PJ, Ketas TJ, Cottrell CA, Ozorowski G, Debnath G, Camara D, Francomano E, Pugach  
520 P, Ringe RP, LaBranche CC, van Gils MJ, Bricault CA, Barouch DH, Crotty S, Silvestri G,  
521 Kasturi S, Pulendran B, Wilson IA, Montefiori DC, Sanders RW, Ward AB, Moore JP. 2018.  
522 Epitopes for neutralizing antibodies induced by HIV-1 envelope glycoprotein BG505 SOSIP  
523 trimers in rabbits and macaques. *PLoS Pathog* 14:e1006913.
- 524 19. Doria-Rose NA, Schramm CA, Gorman J, Moore PL, Bhiman JN, DeKosky BJ, Ernandes MJ,  
525 Georgiev IS, Kim HJ, Pancera M, Staupe RP, Altae-Tran HR, Bailer RT, Crooks ET, Cupo A,  
526 Druz A, Garrett NJ, Hoi KH, Kong R, Louder MK, Longo NS, McKee K, Nonyane M, O'Dell S,

- 527 Roark RS, Rudicell RS, Schmidt SD, Sheward DJ, Soto C, Wibmer CK, Yang Y, Zhang Z, NISC  
528 Comparative Sequencing Program, Mullikin JC, Binley JM, Sanders RW, Wilson IA, Moore JP,  
529 Ward AB, Georgiou G, Williamson C, Abdool Karim SS, Morris L, Kwong PD, Shapiro L,  
530 Mascola JR. 2014. Developmental pathway for potent V1V2-directed HIV-neutralizing  
531 antibodies. *Nature* 509:55–62.
- 532 20. Moore PL, Gray ES, Sheward D, Madiga M, Ranchobe N, Lai Z, Honnen WJ, Nonyane M,  
533 Tumba N, Hermanus T, Sibeko S, Mlisana K, Abdool Karim SS, Williamson C, Pinter A, Morris  
534 L, CAPRISA 002 Study. 2011. Potent and broad neutralization of HIV-1 subtype C by plasma  
535 antibodies targeting a quaternary epitope including residues in the V2 loop. *J Virol* 85:3128–  
536 3141.
- 537 21. Wibmer CK, Bhiman JN, Gray ES, Tumba N, Abdool Karim SS, Williamson C, Morris L, Moore  
538 PL. 2013. Viral escape from HIV-1 neutralizing antibodies drives increased plasma  
539 neutralization breadth through sequential recognition of multiple epitopes and immunotypes.  
540 *PLoS Pathog* 9:e1003738.
- 541 22. Georgiev IS, Doria-Rose NA, Zhou T, Kwon YD, Staupe RP, Moquin S, Chuang G-Y, Louder  
542 MK, Schmidt SD, Altae-Tran HR, Bailer RT, McKee K, Nason M, O'Dell S, Ofek G, Pancera M,  
543 Srivatsan S, Shapiro L, Connors M, Migueles SA, Morris L, Nishimura Y, Martin MA, Mascola  
544 JR, Kwong PD. 2013. Delineating antibody recognition in polyclonal sera from patterns of HIV-1  
545 isolate neutralization. *Science* 340:751–756.
- 546 23. Gray ES, Madiga MC, Hermanus T, Moore PL, Wibmer CK, Tumba NL, Werner L, Mlisana K,  
547 Sibeko S, Williamson C, Abdool Karim SS, Morris L, CAPRISA002 Study Team. 2011. The  
548 neutralization breadth of HIV-1 develops incrementally over four years and is associated with  
549 CD4+ T cell decline and high viral load during acute infection. *J Virol* 85:4828–4840.
- 550 24. Landais E, Murrell B, Briney B, Murrell S, Rantalainen K, Berndsen ZT, Ramos A,  
551 Wickramasinghe L, Smith ML, Eren K, de Val N, Wu M, Cappelletti A, Umotoy J, Lie Y, Wrin T,  
552 Algate P, Chan-Hui P-Y, Karita E, IAVI Protocol C Investigators, IAVI African HIV Research  
553 Network, Ward AB, Wilson IA, Burton DR, Smith D, Pond SLK, Poignard P. 2017. HIV Envelope

- 554 Glycoform Heterogeneity and Localized Diversity Govern the Initiation and Maturation of a V2  
555 Apex Broadly Neutralizing Antibody Lineage. *Immunity* 47:990-1003.e9.
- 556 25. Walker LM, Simek MD, Priddy F, Gach JS, Wagner D, Zwick MB, Phogat SK, Poignard P,  
557 Burton DR. 2010. A limited number of antibody specificities mediate broad and potent serum  
558 neutralization in selected HIV-1 infected individuals. *PLoS Pathog* 6:e1001028.
- 559 26. Bonsignori M, Hwang K-K, Chen X, Tsao C-Y, Morris L, Gray E, Marshall DJ, Crump JA, Kapiga  
560 SH, Sam NE, Sinangil F, Pancera M, Yongping Y, Zhang B, Zhu J, Kwong PD, O'Dell S,  
561 Mascola JR, Wu L, Nabel GJ, Phogat S, Seaman MS, Whitesides JF, Moody MA, Kelsoe G,  
562 Yang X, Sodroski J, Shaw GM, Montefiori DC, Kepler TB, Tomaras GD, Alam SM, Liao H-X,  
563 Haynes BF. 2011. Analysis of a clonal lineage of HIV-1 envelope V2/V3 conformational epitope-  
564 specific broadly neutralizing antibodies and their inferred unmutated common ancestors. *J Virol*  
565 85:9998–10009.
- 566 27. Braibant M, Gong E-Y, Plantier J-C, Moreau T, Alessandri E, Simon F, Barin F. 2013. Cross-  
567 group neutralization of HIV-1 and evidence for conservation of the PG9/PG16 epitopes within  
568 divergent groups. *AIDS* 27:1239–1244.
- 569 28. Morgand M, Bouvin-Pley M, Plantier J-C, Moreau A, Alessandri E, Simon F, Pace CS, Pancera  
570 M, Ho DD, Poignard P, Bjorkman PJ, Mouquet H, Nussenzweig MC, Kwong PD, Baty D,  
571 Chames P, Braibant M, Barin F. 2016. V1/V2 Neutralizing Epitope is Conserved in Divergent  
572 Non-M Groups of HIV-1. *J Acquir Immune Defic Syndr* 71:237–245.
- 573 29. Mishra N, Sharma S, Dobhal A, Kumar S, Chawla H, Singh R, Makhdoomi MA, Das BK, Lodha  
574 R, Kabra SK, Luthra K. 2020. Broadly neutralizing plasma antibodies effective against diverse  
575 autologous circulating viruses in infants with multivariant HIV-1 infection. *bioRxiv* 837039.
- 576 30. Gorman J, Soto C, Yang MM, Davenport TM, Guttman M, Bailer RT, Chambers M, Chuang G-  
577 Y, DeKosky BJ, Doria-Rose NA, Druz A, Ernandes MJ, Georgiev IS, Jarosinski MC, Joyce MG,  
578 Lemmin TM, Leung S, Louder MK, McDaniel JR, Narpala S, Pancera M, Stuckey J, Wu X, Yang  
579 Y, Zhang B, Zhou T, NISC Comparative Sequencing Program, Mullikin JC, Baxa U, Georgiou G,  
580 McDermott AB, Bonsignori M, Haynes BF, Moore PL, Morris L, Lee KK, Shapiro L, Mascola JR,

- 581 Kwong PD. 2016. Structures of HIV-1 Env V1V2 with broadly neutralizing antibodies reveal  
582 commonalities that enable vaccine design. *Nat Struct Mol Biol* 23:81–90.
- 583 31. Lee JH, Andrabi R, Su C-Y, Yasmeen A, Julien J-P, Kong L, Wu NC, McBride R, Sok D,  
584 Pauthner M, Cottrell CA, Nieuwma T, Blattner C, Paulson JC, Klasse PJ, Wilson IA, Burton DR,  
585 Ward AB. 2017. A Broadly Neutralizing Antibody Targets the Dynamic HIV Envelope Trimer  
586 Apex via a Long, Rigidified, and Anionic  $\beta$ -Hairpin Structure. *Immunity* 46:690–702.
- 587 32. Cale EM, Gorman J, Radakovich NA, Crooks ET, Osawa K, Tong T, Li J, Nagarajan R,  
588 Ozorowski G, Ambrozak DR, Asokan M, Bailer RT, Bennici AK, Chen X, Doria-Rose NA, Druz  
589 A, Feng Y, Joyce MG, Louder MK, O'Dell S, Oliver C, Pancera M, Connors M, Hope TJ, Kepler  
590 TB, Wyatt RT, Ward AB, Georgiev IS, Kwong PD, Mascola JR, Binley JM. 2017. Virus-like  
591 Particles Identify an HIV V1V2 Apex-Binding Neutralizing Antibody that Lacks a Protruding  
592 Loop. *Immunity* 46:777-791.e10.
- 593 33. Gorman J, Chuang G-Y, Lai Y-T, Shen C-H, Boyington JC, Druz A, Geng H, Louder MK, McKee  
594 K, Rawi R, Verardi R, Yang Y, Zhang B, Doria-Rose NA, Lin B, Moore PL, Morris L, Shapiro L,  
595 Mascola JR, Kwong PD. 2020. Structure of Super-Potent Antibody CAP256-VRC26.25 in  
596 Complex with HIV-1 Envelope Reveals a Combined Mode of Trimer-Apex Recognition. *Cell Rep*  
597 31:107488.
- 598 34. Munro JB, Gorman J, Ma X, Zhou Z, Arthos J, Burton DR, Koff WC, Courter JR, Smith AB,  
599 Kwong PD, Blanchard SC, Mothes W. 2014. Conformational dynamics of single HIV-1 envelope  
600 trimers on the surface of native virions. *Science* 346:759–763.
- 601 35. Makhdoomi MA, Khan L, Kumar S, Aggarwal H, Singh R, Lodha R, Singla M, Das BK, Kabra  
602 SK, Luthra K. 2017. Evolution of cross-neutralizing antibodies and mapping epitope specificity in  
603 plasma of chronic HIV-1-infected antiretroviral therapy-naïve children from India. *J Gen Virol*  
604 98:1879–1891.
- 605 36. Aggarwal H, Khan L, Chaudhary O, Kumar S, Makhdoomi MA, Singh R, Sharma K, Mishra N,  
606 Lodha R, Srinivas M, Das BK, Kabra SK, Luthra K. 2017. Alterations in B Cell Compartment

- 607 Correlate with Poor Neutralization Response and Disease Progression in HIV-1 Infected  
608 Children. *Front Immunol* 8:1697.
- 609 37. Mishra N, Makhdoomi MA, Sharma S, Kumar S, Dobhal A, Kumar D, Chawla H, Singh R, Kanga  
610 U, Das BK, Lodha R, Kabra SK, Luthra K. 2019. Viral Characteristics Associated with  
611 Maintenance of Elite Neutralizing Activity in Chronically HIV-1 Clade C-Infected Monozygotic  
612 Pediatric Twins. *J Virol* 93.
- 613 38. Agrawal N, Leaman DP, Rowcliffe E, Kinkead H, Nohria R, Akagi J, Bauer K, Du SX, Whalen  
614 RG, Burton DR, Zwick MB. 2011. Functional stability of unliganded envelope glycoprotein spikes  
615 among isolates of human immunodeficiency virus type 1 (HIV-1). *PLoS ONE* 6:e21339.
- 616 39. Gift SK, Leaman DP, Zhang L, Kim AS, Zwick MB. 2017. Functional Stability of HIV-1 Envelope  
617 Trimer Affects Accessibility to Broadly Neutralizing Antibodies at Its Apex. *J Virol* 91.
- 618 40. Lynch RM, Boritz E, Coates EE, DeZure A, Madden P, Costner P, Enama ME, Plummer S,  
619 Holman L, Hendel CS, Gordon I, Casazza J, Conan-Cibotti M, Migueles SA, Tressler R, Bailer  
620 RT, McDermott A, Narpala S, O'Dell S, Wolf G, Lifson JD, Freemire BA, Gorelick RJ, Pandey  
621 JP, Mohan S, Chomont N, Fromentin R, Chun T-W, Fauci AS, Schwartz RM, Koup RA, Douek  
622 DC, Hu Z, Capparelli E, Graham BS, Mascola JR, Ledgerwood JE, VRC 601 Study Team. 2015.  
623 Virologic effects of broadly neutralizing antibody VRC01 administration during chronic HIV-1  
624 infection. *Sci Transl Med* 7:319ra206.
- 625 41. Guzzo C, Zhang P, Liu Q, Kwon AL, Uddin F, Wells AI, Schmeisser H, Cimbro R, Huang J,  
626 Doria-Rose N, Schmidt SD, Dolan MA, Connors M, Mascola JR, Lusso P. 2018. Structural  
627 Constraints at the Trimer Apex Stabilize the HIV-1 Envelope in a Closed, Antibody-Protected  
628 Conformation. *mBio* 9.
- 629 42. Zolla-Pazner S, Cohen SS, Boyd D, Kong X-P, Seaman M, Nussenzweig M, Klein F, Overbaugh  
630 J, Totrov M. 2016. Structure/Function Studies Involving the V3 Region of the HIV-1 Envelope  
631 Delineate Multiple Factors That Affect Neutralization Sensitivity. *J Virol* 90:636–649.
- 632 43. Powell RLR, Totrov M, Itri V, Liu X, Fox A, Zolla-Pazner S. 2017. Plasticity and Epitope  
633 Exposure of the HIV-1 Envelope Trimer. *J Virol* 91.

- 634 44. Rademeyer C, Korber B, Seaman MS, Giorgi EE, Thebus R, Robles A, Sheward DJ, Wagh K,  
635 Garrity J, Carey BR, Gao H, Greene KM, Tang H, Bandawe GP, Marais JC, Diphoko TE, Hraber  
636 P, Tumba N, Moore PL, Gray GE, Kublin J, McElrath MJ, Vermeulen M, Middelkoop K, Bekker  
637 L-G, Hoelscher M, Maboko L, Makhema J, Robb ML, Abdool Karim S, Abdool Karim Q, Kim JH,  
638 Hahn BH, Gao F, Swanstrom R, Morris L, Montefiori DC, Williamson C. 2016. Features of  
639 Recently Transmitted HIV-1 Clade C Viruses that Impact Antibody Recognition: Implications for  
640 Active and Passive Immunization. *PLoS Pathog* 12:e1005742.
- 641 45. Hraber P, Rademeyer C, Williamson C, Seaman MS, Gottardo R, Tang H, Greene K, Gao H,  
642 LaBranche C, Mascola JR, Morris L, Montefiori DC, Korber B. 2017. Panels of HIV-1 Subtype C  
643 Env Reference Strains for Standardized Neutralization Assessments. *J Virol* 91.
- 644 46. Cai Y, Karaca-Griffin S, Chen J, Tian S, Fredette N, Linton CE, Rits-Volloch S, Lu J, Wagh K,  
645 Theiler J, Korber B, Seaman MS, Harrison SC, Carfi A, Chen B. 2017. Antigenicity-defined  
646 conformations of an extremely neutralization-resistant HIV-1 envelope spike. *Proc Natl Acad Sci*  
647 *USA* 114:4477–4482.
- 648 47. Cunyat F, Curriu M, Marfil S, García E, Clotet B, Blanco J, Cabrera C. 2012. Evaluation of the  
649 cytopathicity (fusion/hemifusion) of patient-derived HIV-1 envelope glycoproteins comparing two  
650 effector cell lines. *J Biomol Screen* 17:727–737.
- 651 48. Cabrera-Rodríguez R, Hebmann V, Marfil S, Pernas M, Marrero-Hernández S, Cabrera C,  
652 Urrea V, Casado C, Olivares I, Márquez-Arce D, Pérez-Yanes S, Estévez-Herrera J, Clotet B,  
653 Espert L, López-Galíndez C, Biard-Piechaczyk M, Valenzuela-Fernández A, Blanco J. 2019.  
654 HIV-1 envelope glycoproteins isolated from Viremic Non-Progressor individuals are fully  
655 functional and cytopathic. *Sci Rep* 9:5544.
- 656 49. Shapovalov MV, Dunbrack RL. 2011. A smoothed backbone-dependent rotamer library for  
657 proteins derived from adaptive kernel density estimates and regressions. *Structure* 19:844–858.
- 658 50. Webb B, Sali A. 2016. Comparative Protein Structure Modeling Using MODELLER. *Curr Protoc*  
659 *Protein Sci* 86:2.9.1-2.9.37.



660 51. Pettersen EF, Goddard TD, Huang CC, Couch GS, Greenblatt DM, Meng EC, Ferrin TE. 2004.  
661 UCSF Chimera--a visualization system for exploratory research and analysis. J Comput Chem  
662 25:1605–1612.

### 663 Tables

664 **Table 1 – Amino acid frequency at position 184.** Population frequency for position 184 was  
665 calculated using AnalyzeAlign (see methods) for the web alignment of all reported HIV-1 Env  
666 sequences (7094) available at LANL HIV database.

| Variant  | Count | Frequency |
|----------|-------|-----------|
| I        | 4206  | 0.5929    |
| L        | 2029  | 0.2860    |
| M        | 454   | 0.0640    |
| T        | 138   | 0.0195    |
| V        | 100   | 0.0141    |
| - (Gap)  | 50    | 0.0070    |
| F        | 32    | 0.0045    |
| S        | 20    | 0.0028    |
| N        | 16    | 0.0023    |
| D        | 11    | 0.0016    |
| A        | 9     | 0.0013    |
| P        | 6     | 0.0008    |
| E        | 4     | 0.0006    |
| R        | 4     | 0.0006    |
| * (stop) | 4     | 0.0006    |
| Y        | 3     | 0.0004    |
| H        | 2     | 0.0003    |
| K        | 2     | 0.0003    |
| Q        | 2     | 0.0003    |
| C        | 1     | 0.0001    |

|   |   |        |
|---|---|--------|
| G | 1 | 0.0001 |
| W | 0 | 0.0000 |

667

668 **Table 2 – Neutralization of 73105b and 73106f by known bnAbs.** Neutralization susceptibility of  
 669 73105b and 73106f were assessed utilizing a broad panel of bnAbs targeting all major antigenic sites  
 670 on HIV-1 Env. IC50 values (50% inhibitory concentration) and MPN (maximum percent neutralization)  
 671 for all tested bnAbs are shown and grouped according to the antigenic sites (V2-Apex, V3/N332-  
 672 glycan supersite, CD4bs, Silent Face, gp120/gp41 interface, MPER). Neutralization assays were  
 673 performed with TZM-bl cells and repeated thrice. IC50 values and MPN were calculated based on  
 674 average neutralization.

| bnAbs     |             | Viral Variant |              |              |              |               |               |
|-----------|-------------|---------------|--------------|--------------|--------------|---------------|---------------|
| Epitope   | Name        | 73105b        | 73105c       | 73105d       | 73105e       | 73105h        | 73106f        |
| V2-Apex   | PG9         | <b>0.062</b>  | <b>0.063</b> | <b>0.041</b> | <b>0.077</b> | <b>9.362</b>  | <b>&gt;10</b> |
|           | PG16        | <b>0.077</b>  | <b>0.102</b> | <b>0.092</b> | <b>0.124</b> | <b>3.562</b>  | <b>4.246</b>  |
|           | PGT145      | <b>3.964</b>  | <b>2.256</b> | <b>3.025</b> | <b>2.056</b> | <b>&gt;10</b> | <b>&gt;10</b> |
|           | PGDM1400    | <b>0.005</b>  | <b>0.002</b> | <b>0.004</b> | <b>0.001</b> | <b>4.25</b>   | <b>5.031</b>  |
|           | CAP256.25   | <b>0.051</b>  | <b>0.036</b> | <b>0.042</b> | <b>0.041</b> | <b>&gt;10</b> | <b>&gt;10</b> |
|           | CH01        | <b>2.454</b>  | <b>1.256</b> | <b>2.065</b> | <b>2.036</b> | <b>&gt;10</b> | <b>&gt;10</b> |
| V3-Glycan | 10-1074     | 3.654         | 4.526        | 3.256        | 3.065        | 2.451         | 4.125         |
|           | BG18        | >10           | 9.632        | >10          | >10          | >10           | >10           |
|           | AIIMS-P01   | >10           | >10          | 10           | >10          | >10           | 9.851         |
|           | PGT121      | 3.654         | 3.026        | 2.063        | 2.857        | 1.023         | 2.462         |
|           | PGT128      | >10           | >10          | >10          | >10          | >10           | >10           |
|           | PGT135      | >10           | >10          | >10          | >10          | >10           | >10           |
| CD4bs     | VRC01       | 3.274         | 2.658        | 3.625        | 3.524        | 3.256         | 2.664         |
|           | VRC03       | 6.495         | 5.236        | 6.321        | 4.256        | 2.056         | 4.125         |
|           | VRC07-523LS | 0.984         | 0.742        | 0.685        | 0.954        | 0.745         | 0.847         |
|           | N6          | 0.003         | 0.003        | 0.002        | 0.004        | 0.002         | 0.003         |

|                      |               |       |       |       |       |       |       |
|----------------------|---------------|-------|-------|-------|-------|-------|-------|
|                      | 3BNC117       | 1.259 | 1.026 | 1.625 | 0.985 | 2.056 | 3.624 |
|                      | NIH45-46 G54W | 1.026 | 1.365 | 1.025 | 0.958 | 0.635 | 0.958 |
| Silent Face          | PG05          | >10   | >10   | >10   | >10   | >10   | >10   |
| gp120/gp41 interface | PGT151        | 4.532 | 3.652 | 4.254 | 5.256 | 5.256 | 6.412 |
|                      | 35O22         | >10   | >10   | >10   | >10   | >10   | >10   |
|                      | N123-VRC34.01 | 2.036 | 2.214 | 1.026 | 1.856 | 1.356 | 1.241 |
| MPER                 | 10E8          | 0.971 | 0.748 | 0.985 | 1.255 | 1.635 | 1.654 |
|                      | 4E10          | 4.632 | 3.652 | 3.658 | 4.251 | 2.364 | 2.023 |
|                      | 2F5           | >10   | >10   | >10   | >10   | >10   | >10   |

675

## 676 Figures

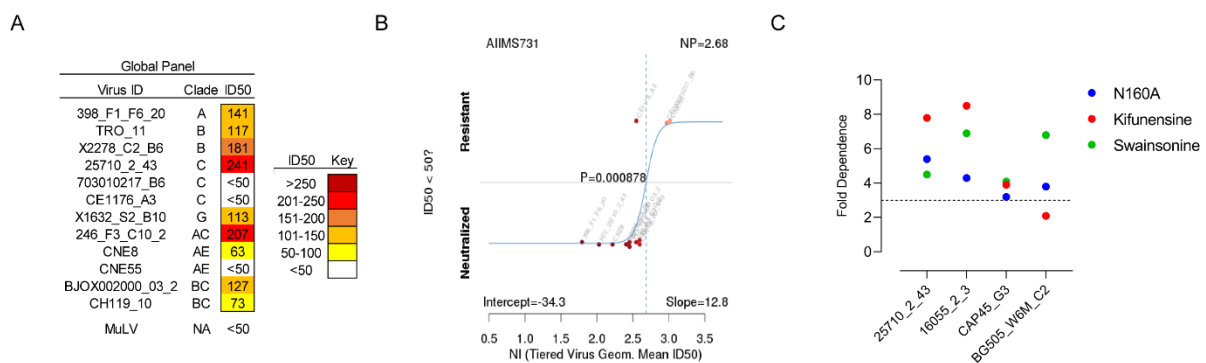

677

## 678 Figure 1 – Plasma bnAbs from infant broad neutralizer AIIIMS731 target the V2-apex of HIV-1

679 **Env.** (A) Heatmap representing HIV-1 specific neutralization titres (inverse plasma dilution) of plasma  
 680 bnAbs from infant broad neutralizer AIIIMS731 against the 12-virus global panel. ID<sub>50</sub> values are color-  
 681 coded per the key given, with darker colors implying higher ID<sub>50</sub> titres. (B) Neutralization indexing  
 682 explaining the plasma's ability to neutralize majority of tier 2 viruses on a tier scale that ranks  
 683 neutralization on a continuous rather than categorical scale. (C) Epitope mapping of AIIIMS731  
 684 plasma bnAbs showing ID<sub>50</sub> fold-change against 25710\_2\_43, 16055\_2\_3, CAP45\_G3 and  
 685 BG505\_W6M\_C2 wildtype pseudoviruses and their N160A mutant, as well as pseudoviruses grown in  
 686 presence of glycosidase inhibitors kifunensine and swainsonine.

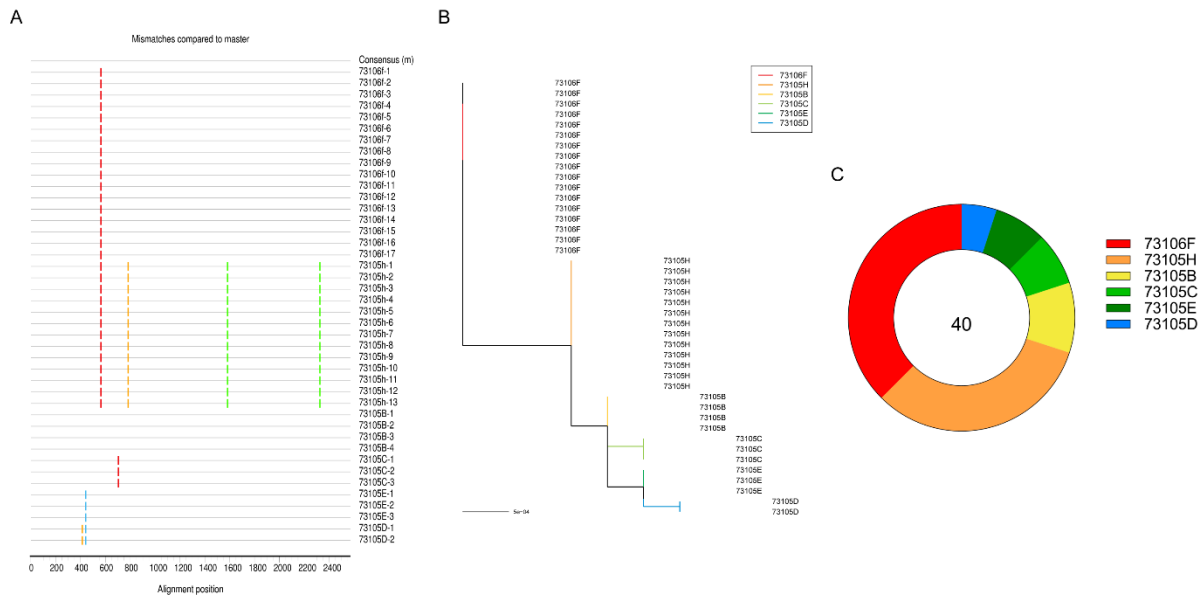

687

688 **Figure 2 – Limited diversity in the circulating viral variants of AIIIMS731.** (A – B) Highlighter plots  
689 with maximum-likelihood trees of 40 SGA env sequences from AIIIMS731 showed limited variability in  
690 the circulating viral variant, and showed the presence of 6 strains circulating at a population frequency  
691 of >5%. In highlighter plot, mutations compared to consensus sequence are represented by green for  
692 adenine, blue for cytosine, orange for guanine and red for thymine. In case of 73105h, both of the  
693 adenine mutations were silent (Green bars). (C) Donut plot showing the distribution of 40 SGA Env  
694 amplicons showed viral variant 73106f and 73105h to be the dominant strains.

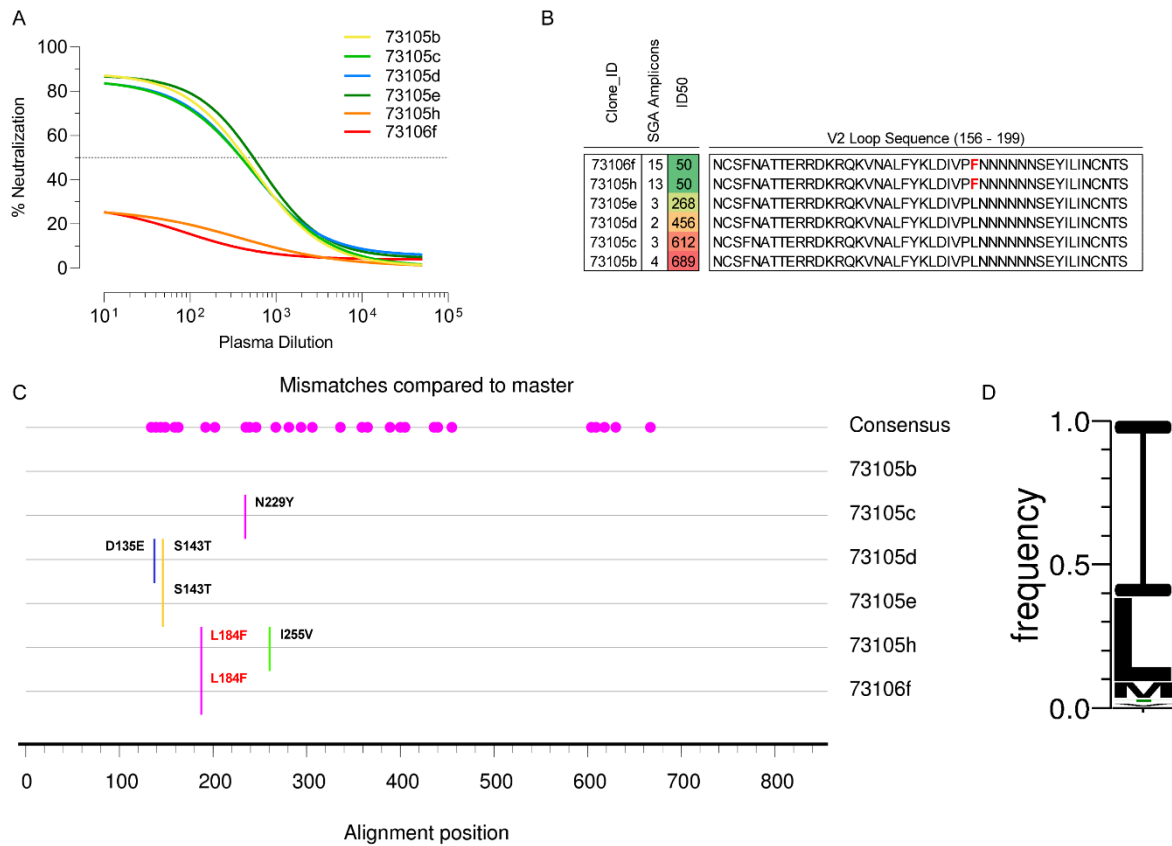

695

696 **Figure 3 – A rare mutation provided neutralization escape from autologous plasma bnAbs in**  
 697 **AIIMS731.** (A) Neutralization susceptibility of circulating viral variants from AIIMS731 to  
 698 contemporaneous autologous plasma bnAbs was assessed via neutralization assays based on TZM-  
 699 bl cells. Even though four of the circulating viral variants were susceptible to plasma bnAbs, maximum  
 700 percent neutralization ranged from 83 to 91%. Viral variants 73105h and 73106f were resistant to  
 701 autologous plasma bnAbs (maximum percent neutralization of 24% and 25% respectively). (B) V2-  
 702 loop sequences (HXB2 numbering 156 – 199) of viral variants showed a leucine-to-phenylalanine  
 703 mutation at position 184. (C) Complete amino acid sequence comparison between all six viral variants  
 704 showed a single mutation (L184F) in 73106f (relative to sensitive strain 73105b) that led to  
 705 neutralization escape from autologous plasma bnAbs. While 73105c also had a rare N229Y mutation,  
 706 no difference in susceptibility to autologous plasma bnAbs was visible. (D) Amino acid frequency plot  
 707 at position 184 in all reported HIV-1 Env sequence (7094 sequences) showed abundance of leucine  
 708 or isoleucine whereas phenylalanine at position 184 occurred at a population frequency of 0.0045%  
 709 (32/7094 of sequences).

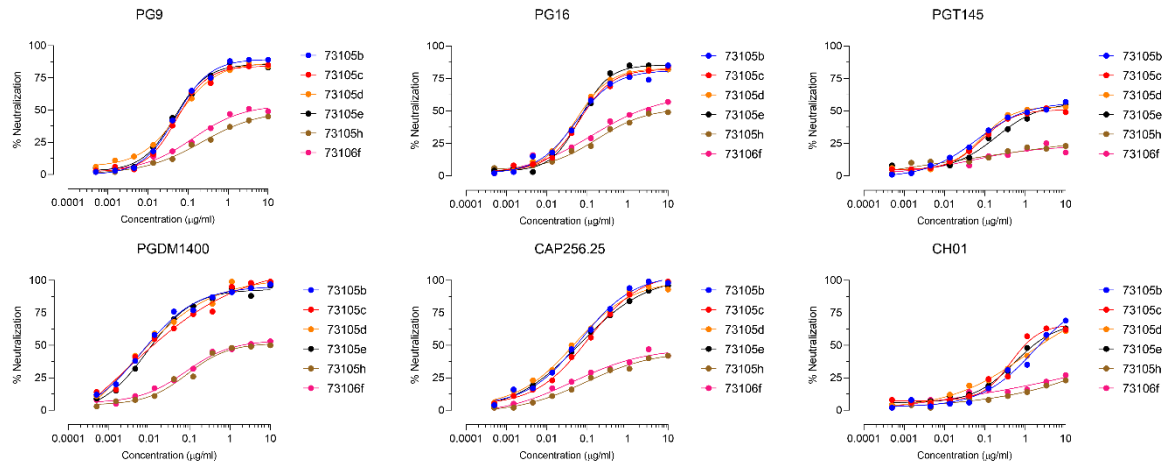

710

711 **Figure 4 – Neutralization curves of AIIIMS731 viral variants against V2-apex bnAbs.**

712 Neutralization susceptibility of all six viral variants to the V2-apex bnAbs (PG9, PG16, PGT145,  
713 PGDM1400, CAP256.25 and CH01) was assessed via neutralization assays based on TZM-bl cells.  
714 Of note, except for PGDM1400 and CAP256.25, none of the V2-apex bnAbs reached 100%  
715 neutralization for AIIIMS731 autologous plasma bnAbs sensitive viral cluster (73105b, 73105c, 73105d  
716 and 73105e) while with the L184F mutant clones 73105h and 73106f (autologous plasma bnAb  
717 resistant cluster), all V2-apex bnAbs showed markedly lower neutralization efficiency. For 73106f,  
718 maximum neutralization of 57% and 53% was reached with PG16 and CAP256.25 respectively.  
719 Neutralization assays were repeated thrice, and curves were drawn based on average neutralization.

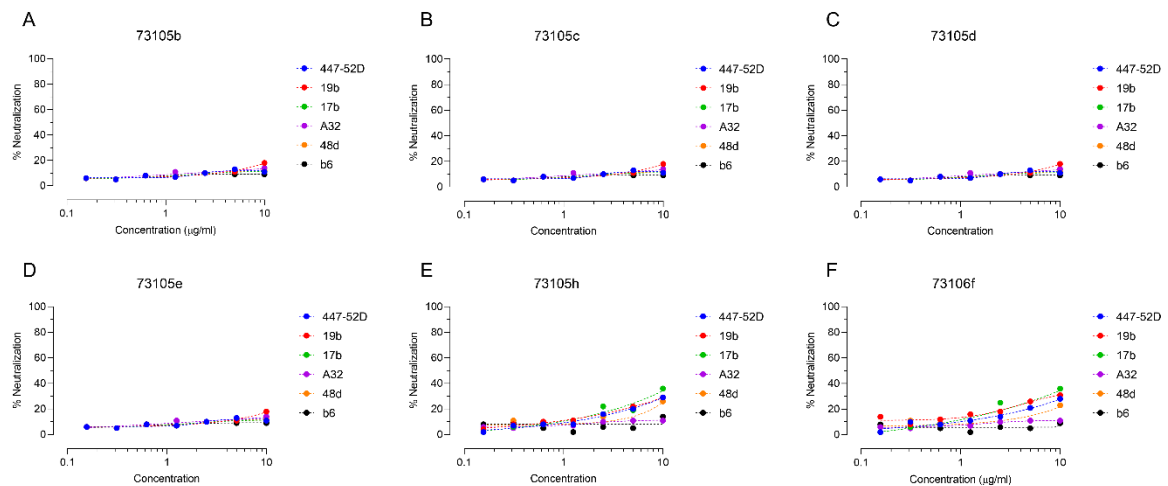

720

721 **Figure 5 – Neutralization of AIIIMS731 viral variants by non-nAbs targeting the V3 Loop and**  
722 **CD4-induced epitopes. (A – F) Neutralization susceptibility of all six viral variants to the V3 loop**  
723 **targeting non-nAbs (447-52D and 19b) and CD4-induced non-nAbs (17b, A32, 48d and b6) was**

724 assessed via neutralization assays based on TZM-bl cells. Viral variant 73105h and 73106f showed  
725 moderate neutralization by 447-52D, 19b, 17b and 48d. Neutralization assays were repeated thrice,  
726 curves were drawn, and MPN were calculated based on average neutralization.

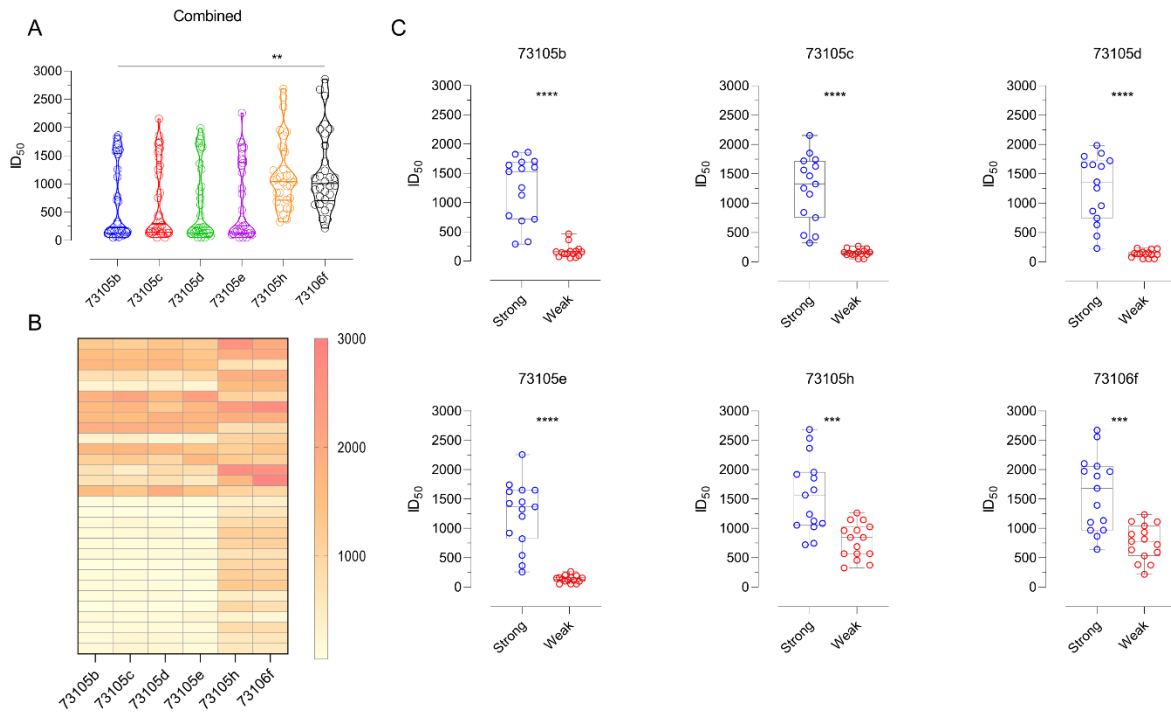

727

728 **Figure 6 – Viral variant 73106f is highly susceptible to subtype-matched heterologous plasma**

729 **antibodies.** (A – B) Violin plot and heatmap representing the neutralization susceptibility of AIIIMS731

730 circulating viral variants against plasma antibodies from HIV-1 infected pediatric individuals in chronic

731 stages of disease was assessed. Distinct neutralization profile was seen for AIIIMS731 autologous

732 plasma bnAbs sensitive (73105b, 73105c, 73105d and 73105e) and resistant (73105h and 73106f)

733 viral clusters. The plasma panel contained well-characterized HIV-1 clade C infected pediatric donors

734 whose plasma antibodies showed varied neutralization activity against the 12-virus global panel.

735 Plasmas were categorized as strong or weak based on their breadth and potency against the 12-virus

736 global panel (see methods). Comparison is shown for 73105b and 73106f, though similar patterns

737 were observed on comparing sensitive vs. resistant clusters. (C) Viruses belonging to sensitive cluster

738 were primarily neutralized by plasma samples that were categorized as strong while viruses belonging

739 to resistant cluster showed considerable neutralization by plasma samples categorized as weak. P-

740 values are given by asterisks where \*\* implies p-value <0.01, \*\*\* implies p-value <0.001 and \*\*\*\*

741 implies p-value <0.0001.

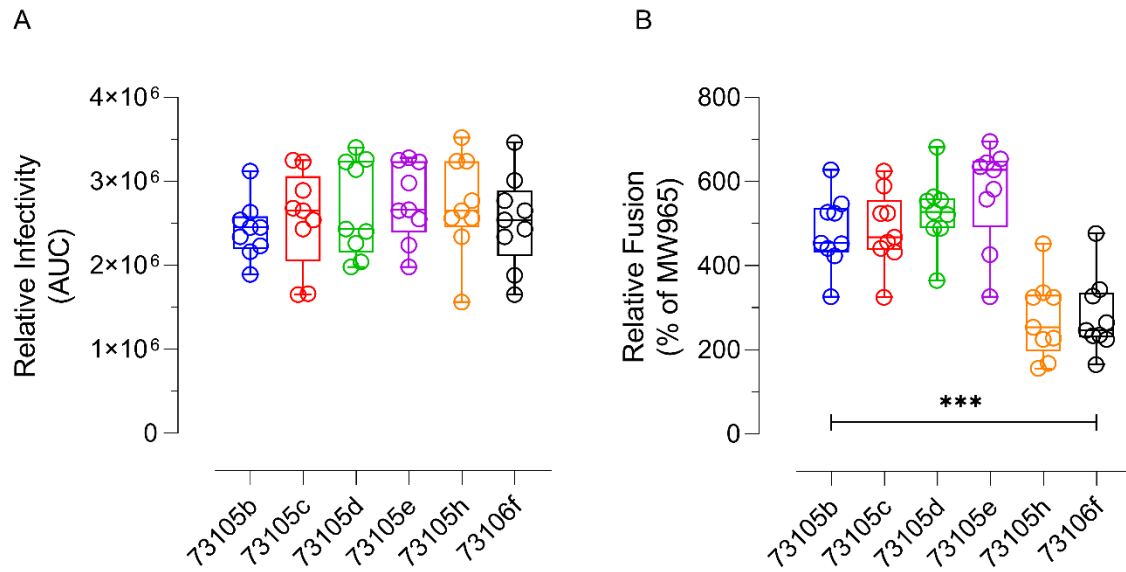

742

743 **Figure 7 – L184F mutation led to reduced cell-cell transmission.** (A) Pseudoviruses were titrated  
744 after normalization and replicate titration curves were used to calculate the area under the curve  
745 (AUC) values. Each experiment was repeated thrice in triplicates providing a total of 9 reference  
746 values. (B) Fusogenicity in co-cultures of Tat/Env co-transfected 293T and TZM-bl cells were used as  
747 a measure of cell-to-cell transmission ability. Fusion of AIMS731 Env in relation to fusion observed  
748 with well-characterized Env of HIV-1 isolate MW965.26 was calculated. Each experiment was  
749 repeated thrice in triplicates providing a total of 9 reference values. 2-tailed student's t test was used  
750 for comparison (\*\*\*) implies p-value <0.001). Comparison is shown for 73105b and 73106f, though  
751 similar patterns were observed on comparing sensitive vs. resistant clusters.

752

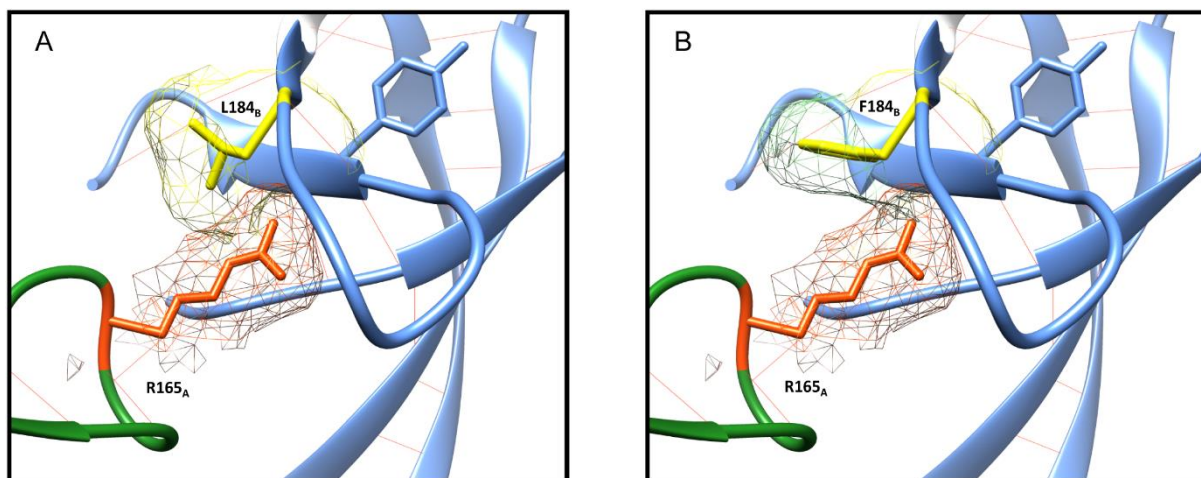



753 **Figure 8 – Critical role of L184 in modulating interprotomer interactions at the trimer apex.**

754 Interprotomer interactions between R165 (protomer A) and L184 (protomer B). The dot mesh  
755 surrounding R165<sub>A</sub> (Orange) and L184<sub>B</sub> and F184<sub>B</sub>(Yellow) represent the solvent-accessible surfaces  
756 (SAS) (van der Waals surfaces expanded by the water molecule radius). In (A) Interprotomer contacts  
757 (lipophilic) between R165<sub>A</sub> and L184<sub>B</sub> can be seen by overlapping SAS. In case of F184<sub>B</sub>, no  
758 interprotomer contacts can be seen, evident by the lack of SAS overlap. The HIV-1 Env protomeric  
759 backbones are represented by two distinct colors (protomer A as green and protomer B as cornflower  
760 blue). The illustration was generated from PDB entry 4ZMJ. L165 and I184 were rotamerized to  
761 respective residues in 73105b (R165 and L184) and 73106f (R165 and F184).
